# Supplementary material for: Desorption electrospray ionization-mass spectrometry for the detection of analytes extracted by thin-film molecularly imprinted polymers
Source: Royal Society of Chemistry journal article supplement (doi:10.1039/c0an00331j), 2010-01-01
Supplement: c0an00331j.pdf [file c0an00331j.pdf]

## Supporting Information

### **Desorption Electrospray Ionization – Mass Spectrometry for the Detection of Analytes Extracted**

#### **by Thin-Film 2,4-Dichlorophenoxyacetic Acid Molecularly Imprinted Polymers**

**Geert Van Biesen, Justin M. Wiseman and Christina S. Bottaro\***

This supporting information gives a detailed description of the derivatization of the glass slides, the preparation of the MIPs, the experimental conditions for DESI-MS, a mass spectrum of a MIP before and after removal of the template, a MS/MS spectrum of 2,4-D, and DESI-MS spectra of a TLC plate, NIP and MIP used for extraction from river water containing 1.0 mg/L 2,4-D and analogs.

### **Derivatization of glass slides**

Microscope glass slides (Fisherbrand) were cut in half and cleaned by immersion in an HCl/methanol (1:1 v/v) solution for 30 minutes. They were rinsed with deionized water, followed by ethanol (95%), and were then dried at 60 °C for about an hour. The cleaned, dry glass slides were derivatized overnight with a 2% (v/v) solution of 3-(trimethoxysilyl) propylmethacrylate in toluene, rinsed with ethanol (95%) and blown dry with a stream of nitrogen gas.

### **Preparation of MIPs**

All reagents were from Sigma-Aldrich and were used as received. The ingredients (Table S1) were weighed or pipetted into a 2-mL vial, and vortex mixed until complete dissolution. The clear solution was sonicated for a few minutes to remove dissolved air, and 8  $\mu$ L was then pipetted onto a derivatized glass slide. The drop was allowed to spread out for a few seconds, and a glass cover slide was placed on top. Polymerization was initiated with a UV lamp (254 nm – 6 W) positioned approximately 0.5 cm above the slides, for 30 minutes. The cover slide was then removed, and the glass slide with MIP was placed in a methanol/acetic acid solution (90:10 v/v) under stirring for 3 hours to remove the template and any unreacted reagents. This was repeated with fresh methanol/acetic acid solution for another 3 hours, methanol for 3 hours, and finally methanol overnight. The MIPs were dried with a stream of nitrogen gas, and stored under ambient conditions until use. As a control, non-imprinted polymers (NIPs), which did not contain the 2,4-D template, were prepared using the same methodology.

**Table S1:** Composition of MIPs and NIPs

|                                    | MIP                     | NIP                     |
|------------------------------------|-------------------------|-------------------------|
| 2,4-D                              | 8.84 mg (0.04 mmol)     | -                       |
| 4-Vinylpyridine                    | 17 $\mu$ L (0.16 mmol)  | 17 $\mu$ L (0.16 mmol)  |
| Ethyleneglycol dimethacrylate      | 151 $\mu$ L (0.80 mmol) | 151 $\mu$ L (0.80 mmol) |
| 2,2-dimethoxy-2-phenylacetophenone | 3.1 mg (0.012 mmol)     | 3.1 mg (0.012 mmol)     |
| MeOH/H <sub>2</sub> O 4/1          | 200 $\mu$ L             | 200 $\mu$ L             |

### DESI source settings and diagnostic ions

**Table S2:** DESI source settings

| Parameter                       | Settings        |
|---------------------------------|-----------------|
| ES voltage                      | 3 kV            |
| Solvent flow rate               | 5 $\mu$ L/min   |
| Gas pressure                    | 150 psi         |
| Distance from tip to surface    | 1 mm            |
| MS inlet temperature            | 350 °C          |
| Spray impact angle ( $\alpha$ ) | 55°             |
| Collect angle ( $\beta$ )       | ~ 10°           |
| Solvent                         | MeOH/HOAc 90:10 |
| Surface scan rate               | 200 $\mu$ m/s   |

**Table S3:** Precursor and product ions for identifying analytes

| Analyte  | Precursor ( $m/z$ ) | Product ion ( $m/z$ ) |
|----------|---------------------|-----------------------|
| PAA      | 151                 | 107                   |
| 2,4-DCAA | 203                 | 159                   |
| 4-CPA    | 185                 | 127                   |
| 2,4-D    | 219                 | 161                   |
| 2,4,5-T  | 253                 | 195                   |

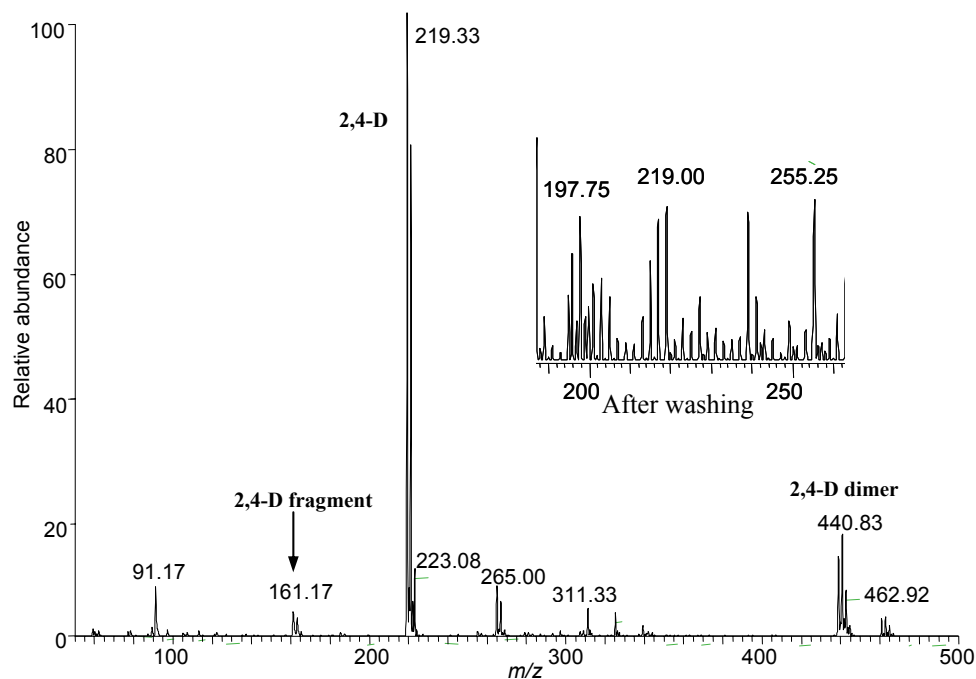

**Fig S1:** Full scan DESI-MS spectra of MIP after preparation (before washing). The absolute intensity of the base peak is  $\sim 3200$ . The inset shows the spectrum of an MIP after washing to remove the 2,4-D template. There is a small peak at  $m/z$  219 (absolute intensity = 5), but it is unlikely that this is 2,4-D since there is no accompanying isotope peak of the right intensity at  $m/z$  221, and MS/MS did not find the characteristic fragment at  $m/z$  161.

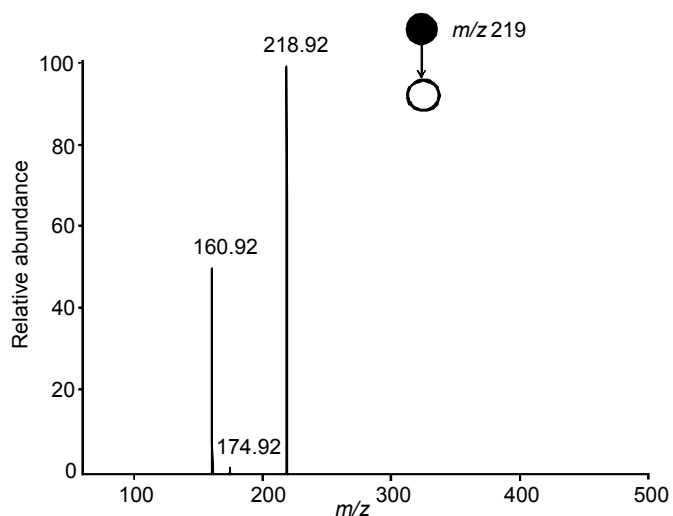

**Fig. S2:** DESI-MS/MS of 2,4-D using the Thermo Scientific LTQ mass spectrometer. CE (collision energy, arb units): 15; isolation width:  $\pm 1$   $m/z$ ; activation time: 30 ms.

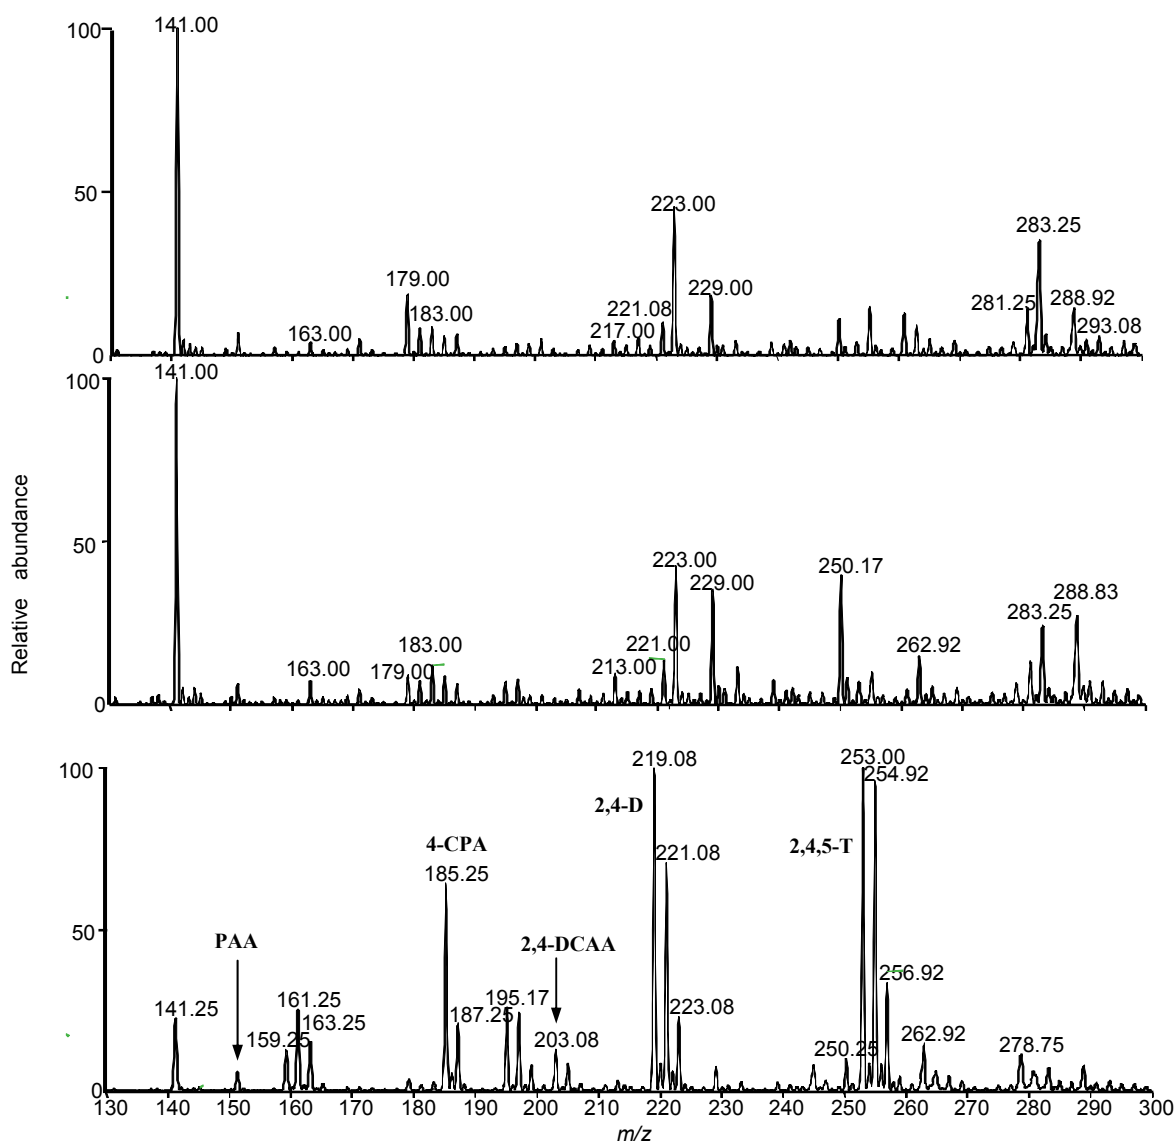

**Fig. S3:** DESI-MS negative ion mass spectra of 1.0 ppm spiked river water samples extracted with (a) TLC plate (b) NIP and (c) MIP.
